# Supplementary material
Source: PubMed Central journal article supplement (PMC9857811)
Supplement: jamapsychiatry-e224394-s001.pdf [file jamapsychiatry-e224394-s001.pdf]

## Supplemental Online Content

Zandberg J, Waller R, Visoki E, Barzilay R. Association between state-level access to reproductive care and suicide rates among women of reproductive age in the United States. *JAMA Psychiatry*. Published online December 28, 2022. doi:10.1001/jamapsychiatry.2022.4394

**eMethods.** Access index scoring scheme

**eTable 1.** Detailed description of the Targeted Regulation of Abortion Providers (TRAP) laws in the United States.

**eTable 2.** TRAP laws dynamics in the United States during the study period

**eTable 3.** Rates of death due to suicide (per 100,000) among women of reproductive age (20-34) from 1974-2016.

**eTable 4.** Multivariate regression analysis with state and year fixed effects for TRAP laws' enforcement, suicide rates, and motor vehicle crashes deaths between 1976 and 2016 examining wider age ranges.

**eTable 5.** Multivariate regression analysis with state and year fixed effects for TRAP laws' enforcement, suicide rates, and motor vehicle crashes deaths between 1976 and 2016 examining all age bins.

**eTable 6.** Multivariate regression analysis with state and year fixed effects for TRAP laws' enforcement, suicide rates, and motor vehicle crashes deaths between 1974 and 2016 excluding unemployment rate.

**eTable 7.** Multivariate regression analysis with state and year fixed effects for the weighted access index, suicide rates, and motor vehicle crashes deaths between 2006 and 2017 examining wider age ranges.

**eTable 8.** Multivariate regression analysis with state and year fixed effects for the unweighted access index, suicide rates, and motor vehicle crashes deaths between 2006 and 2017.

**eFigure 1.** Suicide death rates (left panel) and motor vehicle crashes death rates of women ages 20-34 and 45-64 in the United States during the study period.

**eFigure 2.** Total number of enforced TRAP laws at the state- and year-level.

**eFigure 3.** Unweighted Access Index by year from 2006-2017

**eFigure 4.** Weighted Access Index by year from 2006-2017

**eFigure 5.** Dynamic difference-in-differences in motor vehicle accident death rates around a TRAP law enforcement split by relative years of enforcement

This supplemental material has been provided by the authors to give readers additional information about their work.

## **eMethods.** Access index scoring scheme

The following scoring scheme is an extract from Zandberg (2021) and follows closely the methodology detailed in the 2015 NARAL ``Who decides?" report. The report classifies these 17 categories and weighs them according to their effectiveness in restricting accessibility to reproductive care.

1. Abortion bans: 20 points were subtracted for each abortion ban based either on the point in pregnancy when the ban(s) begin or on whether the statute bans a specific procedure.
2. Biased counseling and mandatory delays: 25 points were subtracted if waiting period or multiple trips were required, whether a physician is required personally to provide specified information, whether the woman must receive state prepared materials, and whether the woman must receive other material, oral or written, that contains biased information.
3. Gag rule: 10 points were subtracted if the ban applies to counseling and/or referrals and if the ban applies to all or some public funds or employees.
4. Crisis pregnancy centers (CPC): 15 points were subtracted if a state funds CPCs directly with taxpayer dollars or tax benefits, requires a woman to go to a CPC, or refers women to CPCs. CPCs are centers that encourage women to keep their pregnancies.
5. Emergency contraception: 25 points were added if the state ensures that sexual assault survivors receive counseling about and access to emergency contraception (EC) in emergency rooms, if the state's Medicaid program covers over-the-counter EC, and if pharmacists are allowed to provide EC to a woman without a prescription through a measure specific to EC or one that permits collaborative therapy agreements generally and includes EC.
6. Freedom of Choice Act: 55 points were added if a state has passed legislation to codify the protections of Roe v. Wade.

7. Guaranteed access to prescriptions: 10 points were added if a state explicitly guarantees a woman's right to have her birth control prescription filled.
8. Insurance coverage for abortion: 35 points were added if state guarantees insurance coverage of abortion.
9. Insurance coverage for contraception: 20 points were added if a state requires health-insurance plans to cover contraceptives to the same extent that they cover other prescription medication.
10. Low-income access to abortion: 25 points were subtracted if the state medical assistance program funds abortion services only to preserve the woman's life or only in cases of rape, incest, or life endangerment.
11. Low-income access to contraceptive: 5 points were added if the state provides increased coverage for Medicaid-covered reproductive-health-care services through a federal Medicaid waiver or through a family planning state plan amendment.
12. Post viability abortion restriction: 10 points were subtracted for the lack or inadequacy of the health exception and if the state defines viability as occurring at a particular point in pregnancy.
13. Protection against clinic violence: 15 points were added if the measure prohibits interference with the entry or exit to a facility.
14. Refusal to provide medical services: 20 points were subtracted if individuals or organizations may refuse to provide abortion, contraception, or sterilization, and/or related counseling, referrals, insurance coverage, or prescriptions.
15. Restrictions on young women: 25 points were subtracted based on whether consent or notice is required before a minor may obtain abortion services.
16. State constitutional protection: 20 points were added if a state constitutional protection prevents imposition of restrictions on the right to choose.
17. TRAP laws: 30 points were subtracted if TRAP measures are imposed.

**eTable 1:** Detailed description of the Targeted Regulation of Abortion Providers (TRAP) laws in the United States [extracted from Austin and Harper (2019)].

| Policy type                                   | Description                                                                                                                                                                                                                                                                                                                                                                                                                                                                                                                                                                                                                                                                                                                                                                                                                                                                                                                                                                                                                                               |
|-----------------------------------------------|-----------------------------------------------------------------------------------------------------------------------------------------------------------------------------------------------------------------------------------------------------------------------------------------------------------------------------------------------------------------------------------------------------------------------------------------------------------------------------------------------------------------------------------------------------------------------------------------------------------------------------------------------------------------------------------------------------------------------------------------------------------------------------------------------------------------------------------------------------------------------------------------------------------------------------------------------------------------------------------------------------------------------------------------------------------|
| Ambulatory surgical center (ASC) requirements | Many states subject abortion providers to the same regulations as ambulatory surgical centers. This type of legislation requires abortion providers to conform to strict facility and personnel guidelines. ASC requirements can apply to all providers or only to those providing abortion beyond a certain gestational age (often early in the second trimester). Regulations governing ASCs are extensive and generally unnecessary for abortion providers. ASC regulations may force existing providers to undergo extensive renovations or purchase unnecessary equipment, the costs of which may be insurmountable.                                                                                                                                                                                                                                                                                                                                                                                                                                 |
| Admitting privileges                          | Admitting privilege laws require abortion providers to have hospital/admitting privileges in place at a nearby hospital (the proximity is often explicitly stated). Missouri was the first state to enact such a policy in 1986; these laws remained relatively rare until 2011. Several states successfully established these laws, but they were tied up in legal challenges in many other states. Notably, this was a focal point of <i>Whole Women vs. Hellerstedt</i> ; admitting privilege requirements for abortion providers were found unconstitutional, which has since resonated across other states with similar legislation. This does not, however, change the fact that these laws were in effect for a number of years in a number of states. Guttmacher describes a “minimum admissions threshold” that is often part of gaining admitting privileges at a hospital; because the complication rate is so low with abortion, providers may be unable to satisfy this requirement and would therefore not be granted admitting privileges. |
| Transfer agreements                           | Transfer agreements are a common component of ASC regulations and require any ASC facility to have a written agreement in place with a nearby hospital in case of emergency. In contrast to admitting privilege requirements, transfer agreements are facility-level policies and are generally viewed as easier to secure. However, the American Public Health Association maintains that neither admitting privilege requirements nor transfer agreements are medically necessary for abortion providers; while hospitals have a legal obligation to provide emergency care to any patient, they do not have any legal obligation to extend admitting privileges or enter into formal transfer agreements with abortion providers (66). Several states allow clinics to get either admitting privileges or a transfer agreement; while this is certainly more flexible, neither measure is medically necessary.                                                                                                                                         |

**eTable 2:** TRAP laws dynamics in the United States during the study period [extracted from Austin and Harper (2019)].

|                                                              | Ambulatory surgical center |          |         | Admitting privileges |          |         | Transfer agreements |          |         |
|--------------------------------------------------------------|----------------------------|----------|---------|----------------------|----------|---------|---------------------|----------|---------|
|                                                              | Enacted                    | Enforced | Blocked | Enacted              | Enforced | Blocked | Enacted             | Enforced | Blocked |
| AK                                                           | 1970                       | 1970     | -       | -                    | -        | -       | 1970                | 1970     | -       |
| FL                                                           | -                          | -        | -       | 2016                 | 2016     | -       | 2016                | 2016     | -       |
| GA                                                           | 1974                       | 1974     | -       | 1974                 | 1974     | -       | 1974                | 1974     | -       |
| IL                                                           | 1973                       | 1973     | -       | 1973                 | 1973     | -       | 1973                | 1973     | -       |
| IN                                                           | 1973                       | 1973     | -       | 2011                 | 2011     | -       | 1973                | 1973     | -       |
| KY                                                           | -                          | -        | -       | -                    | -        | -       | 1998                | 1998     | -       |
| LA                                                           | -                          | -        | -       | 2014                 | 2014     | 2016    | -                   | -        | -       |
| MD                                                           | 2012                       | 2012     | -       | -                    | -        | -       | -                   | -        | -       |
| MI                                                           | 1999                       | 1999     | -       | -                    | -        | -       | 1999                | 1999     | -       |
| MO                                                           | 2007                       | 2007     | 2017    | 1986                 | 1988     | 2017    | 2007                | 2007     | 2017    |
| MS                                                           | 2005                       | 2005     | -       | 2012                 | 2013     | 2013    | 2012                | 2013     | -       |
| ND                                                           | -                          | -        | -       | 2013                 | 2014     | -       | -                   | -        | -       |
| OH                                                           | 1999                       | 1999     | -       | -                    | -        | -       | 1999                | 1999     | -       |
| PA                                                           | 2011                       | 2012     | -       | 2011                 | 2012     | -       | 2011                | 2012     | -       |
| RI                                                           | 1973                       | 1973     | -       | -                    | -        | -       | -                   | -        | -       |
| SC                                                           | 1995                       | 1996     | -       | 1995                 | 1996     | -       | 1995                | 1996     | -       |
| TN                                                           | 2015                       | 2015     | -       | 2012                 | 2012     | -       | 2015                | 2015     | -       |
| TX                                                           | 2003                       | 2004     | -       | 2013                 | 2013     | 2016    | -                   | -        | -       |
| UT                                                           | -                          | -        | -       | 1998                 | 1998     | 2017    | 1998                | 1998     | 2017    |
| VA                                                           | 2011                       | 2012     | -       | -                    | -        | -       | 2011                | 2012     | -       |
| WI                                                           | -                          | -        | -       | 2013                 | 0        | 2015    | 1976                | 1976     | -       |
| <i>States that enacted a TRAP law but never enforced it:</i> |                            |          |         |                      |          |         |                     |          |         |
| AL                                                           | -                          | -        | -       | 2013                 | 0        | 2014    | -                   | -        | -       |
| AR                                                           | -                          | -        | -       | 2015                 | 0        | 2015    | -                   | -        | -       |
| KS                                                           | 2011                       | 0        | 2011    | 2011                 | 0        | 2011    | 2011                | 0        | 2011    |
| OK                                                           | -                          | -        | -       | 2014                 | 0        | 2014    | -                   | -        | -       |

**eTable 3: Rates of death due to suicide (per 100,000) among women of reproductive age (20-34) from 1974-2016.**

| State          | 1974 | 1975 | 1976 | 1977 | 1978 | 1979 | 1980 | 1981 | 1982 | 1983 | 1984 | 1985 | 1986 | 1987 | 1988 | 1989 | 1990 | 1991 | 1992 | 1993 | 1994 | 1995 | 1996 | 1997 | 1998 | 1999 | 2000 | 2001 | 2002 | 2003 | 2004 | 2005 | 2006 | 2007 | 2008 | 2009 | 2010 | 2011 | 2012 | 2013 | 2014 | 2015 | 2016 |      |      |     |      |   |      |
|----------------|------|------|------|------|------|------|------|------|------|------|------|------|------|------|------|------|------|------|------|------|------|------|------|------|------|------|------|------|------|------|------|------|------|------|------|------|------|------|------|------|------|------|------|------|------|-----|------|---|------|
| Alabama        | 5.4  | 5.7  | 5.2  | 4.6  | 4.3  | 4.2  | 4.1  | 4.4  | 5.4  | 5.1  | 3.9  | 3.3  | 3.7  | 4.2  | 5.6  | -    | -    | -    | -    | -    | 5.1  | -    | -    | -    | -    | 5.2  | -    | -    | -    | -    | -    | -    | -    | -    | -    | -    | -    | -    | -    | -    | -    | -    | 6.9  | -    |      |     |      |   |      |
| Alaska         | 4.1  | 16.6 | 17.0 | 14.8 | 9.6  | -    | 14.2 | 10.7 | 8.7  | -    | 7.8  | 10.3 | -    | 8.1  | 2.7  | -    | -    | -    | -    | -    | -    | -    | -    | -    | -    | -    | -    | -    | -    | -    | -    | -    | -    | -    | -    | -    | -    | -    | -    | -    | -    | -    | -    | -    | -    | -   |      |   |      |
| Arizona        | 14.7 | 11.0 | 11.9 | 14.6 | 9.2  | 11.6 | 9.7  | 9.9  | 8.9  | 9.7  | 6.2  | 6.4  | 11.3 | 9.9  | 9.1  | 7.1  | -    | 6.1  | -    | -    | 7.0  | -    | 7.4  | 6.4  | -    | -    | -    | -    | -    | 6.7  | -    | 6.7  | 6.3  | -    | 9.5  | 7.6  | 7.3  | 9.2  | 9.1  | 9.1  | 10.6 | 9.9  | -    | -    |      |     |      |   |      |
| Arkansas       | 7.1  | 4.2  | 5.7  | 4.4  | 3.5  | 6.4  | 4.8  | 6.9  | 6.2  | 6.1  | 5.7  | 6.4  | 6.4  | -    | 4.8  | -    | -    | -    | -    | -    | -    | -    | -    | -    | -    | -    | -    | -    | -    | -    | -    | -    | -    | -    | -    | -    | -    | -    | -    | -    | -    | -    | -    | -    | -    |     |      |   |      |
| California     | 14.1 | 12.8 | 12.9 | 13.4 | 9.9  | 9.9  | 8.2  | 9.1  | 9.3  | 7.1  | 6.6  | 7.5  | 6.0  | 5.6  | 5.4  | 5.6  | 4.6  | 4.6  | 4.7  | 4.5  | 4.6  | 4.4  | 4.4  | 3.9  | 4.3  | 3.7  | 3.0  | 3.1  | 3.7  | 4.0  | 4.1  | 3.3  | 3.2  | 3.7  | 4.4  | 4.0  | 4.1  | 4.1  | 3.8  | 4.4  | 4.0  | 4.8  | 4.1  | -    |      |     |      |   |      |
| Colorado       | 10.0 | 10.1 | 11.0 | 12.3 | 10.1 | 7.4  | 7.2  | 9.2  | 7.9  | 8.0  | 6.5  | 8.9  | 6.6  | 7.2  | 9.0  | -    | -    | -    | -    | -    | -    | 8.2  | 6.9  | -    | -    | -    | -    | -    | 6.0  | 5.6  | -    | 6.6  | 8.2  | 7.7  | 6.1  | 7.8  | 8.3  | 11.3 | 11.2 | 9.6  | 9.4  | 7.6  | 10.7 | -    | -    |     |      |   |      |
| Connecticut    | 2.6  | 4.2  | 5.5  | 5.4  | 5.6  | 3.7  | 5.2  | 5.0  | 4.0  | 2.7  | 2.9  | 2.7  | 4.3  | 3.1  | 3.1  | -    | -    | -    | -    | -    | -    | -    | -    | -    | -    | -    | -    | -    | -    | -    | -    | -    | -    | -    | -    | -    | -    | -    | -    | -    | -    | -    | -    | -    | -    |     |      |   |      |
| Delaware       | -    | 6.9  | 6.7  | 5.3  | 6.5  | -    | 8.9  | 4.9  | -    | 8.5  | 4.8  | 3.5  | 7.0  | 9.2  | -    | -    | -    | -    | -    | -    | -    | -    | -    | -    | -    | -    | -    | -    | -    | -    | -    | -    | -    | -    | -    | -    | -    | -    | -    | -    | -    | -    | -    | -    | -    | -   |      |   |      |
| Florida        | 11.7 | 11.0 | 10.1 | 10.7 | 10.1 | 11.0 | 10.7 | 9.3  | 8.9  | 9.1  | 7.7  | 6.0  | 7.3  | 7.1  | 6.3  | 6.7  | 6.6  | 6.2  | 5.5  | 6.8  | 6.0  | 5.5  | 5.3  | 6.2  | 6.1  | 5.0  | 4.0  | 5.6  | 5.1  | 4.7  | 5.0  | 5.5  | 4.5  | 5.8  | 5.6  | 5.9  | 5.3  | 5.1  | 5.8  | 5.7  | 5.7  | 6.6  | 5.9  | -    |      |     |      |   |      |
| Georgia        | 9.3  | 10.2 | 6.9  | 8.7  | 7.0  | 7.5  | 6.9  | 6.5  | 6.2  | 7.1  | 5.0  | 5.1  | 5.0  | 5.4  | 6.0  | -    | 5.6  | -    | 4.4  | 3.4  | -    | 3.9  | -    | -    | -    | -    | 4.3  | 4.7  | -    | -    | 3.7  | -    | 3.6  | 3.6  | 4.6  | 4.6  | 4.7  | 3.9  | -    | 5.1  | 4.8  | 4.6  | 5.7  | 5.5  | -    |     |      |   |      |
| Hawaii         | 12.8 | 6.1  | 9.2  | 13.0 | 4.8  | 11.5 | 7.4  | 4.4  | 6.6  | -    | 3.6  | 5.8  | 6.5  | -    | -    | -    | -    | -    | -    | -    | -    | -    | -    | -    | -    | -    | -    | -    | -    | -    | -    | -    | -    | -    | -    | -    | -    | -    | -    | -    | -    | -    | -    | -    | -    | -   |      |   |      |
| Idaho          | 7.8  | -    | 10.8 | 4.7  | 6.2  | 6.9  | 3.4  | 4.9  | 6.6  | 10.7 | 7.5  | 8.4  | 6.9  | 10.6 | 10.0 | -    | -    | -    | -    | -    | -    | -    | -    | -    | -    | -    | -    | -    | -    | -    | -    | -    | -    | -    | -    | -    | -    | -    | -    | -    | -    | -    | -    | -    | -    | -   | -    |   |      |
| Illinois       | 4.1  | 5.2  | 5.5  | 6.2  | 5.4  | 5.6  | 4.7  | 5.2  | 4.1  | 5.6  | 5.2  | 5.2  | 4.7  | 5.0  | 5.3  | 4.5  | 4.8  | 3.9  | 3.8  | 4.1  | 3.7  | 2.9  | 3.8  | 3.0  | 4.0  | 3.0  | 2.6  | 2.5  | 4.1  | 3.9  | -    | 2.9  | 2.7  | 2.6  | 3.5  | 3.6  | 3.6  | 4.4  | 3.7  | 5.0  | 4.9  | 4.8  | 5.3  | -    |      |     |      |   |      |
| Indiana        | 4.4  | 6.7  | 4.5  | 6.6  | 6.0  | 5.6  | 4.1  | 4.3  | 5.9  | 5.3  | 4.9  | 3.9  | 4.1  | 4.4  | 3.5  | -    | 6.2  | -    | -    | -    | -    | -    | 6.4  | -    | 4.9  | 3.7  | -    | -    | -    | -    | -    | -    | -    | -    | -    | -    | 6.5  | -    | 6.3  | 7.5  | -    | 6.9  | 6.6  | -    | -    |     |      |   |      |
| Iowa           | 3.6  | 5.6  | 5.1  | 5.0  | 4.0  | 4.5  | 4.5  | 5.2  | 3.9  | 5.8  | 6.7  | 3.4  | 5.0  | 5.1  | 4.0  | -    | -    | -    | -    | -    | -    | -    | -    | -    | -    | -    | -    | -    | -    | -    | -    | -    | -    | -    | -    | -    | -    | -    | -    | -    | -    | 6.9  | -    | -    | -    |     |      |   |      |
| Kansas         | 3.6  | 9.3  | 6.7  | 6.9  | 7.0  | 7.2  | 8.4  | 5.2  | 4.8  | 7.7  | -    | 6.7  | 4.2  | 4.9  | 4.0  | -    | -    | -    | -    | -    | -    | -    | -    | -    | -    | -    | -    | -    | -    | -    | -    | -    | -    | -    | -    | -    | -    | -    | -    | -    | -    | -    | -    | -    | -    | -   |      |   |      |
| Kentucky       | 4.4  | 6.1  | 5.4  | 5.7  | 5.6  | 6.5  | 6.0  | 7.9  | 5.6  | 6.2  | 5.4  | 5.4  | 6.3  | 6.6  | 4.1  | -    | -    | -    | -    | -    | -    | -    | -    | -    | -    | -    | -    | -    | -    | -    | -    | -    | -    | -    | -    | -    | -    | -    | -    | -    | 8.5  | -    | 6.5  | -    | -    |     |      |   |      |
| Louisiana      | 7.3  | 5.4  | 3.9  | 8.2  | 9.3  | 9.5  | 7.2  | 6.7  | 7.7  | 9.1  | 7.9  | 8.8  | 6.1  | 7.6  | 8.9  | -    | -    | -    | -    | 5.5  | -    | 6.3  | -    | 5.8  | -    | -    | -    | -    | -    | -    | -    | -    | -    | -    | -    | 6.2  | -    | -    | -    | -    | -    | 9.0  | -    | 9.8  | -    | -   |      |   |      |
| Maine          | 6.1  | 6.7  | 8.0  | 6.9  | 8.2  | 4.3  | 4.3  | 9.8  | 8.4  | 10.4 | 10.3 | 7.5  | 5.5  | -    | 4.1  | -    | -    | -    | -    | -    | -    | -    | -    | -    | -    | -    | -    | -    | -    | -    | -    | -    | -    | -    | -    | -    | -    | -    | -    | -    | -    | -    | -    | -    | -    | -   |      |   |      |
| Maryland       | 7.1  | 7.1  | 6.0  | 4.6  | 5.7  | 5.8  | 5.6  | 3.9  | 6.0  | 5.4  | 4.0  | 4.1  | 5.6  | 6.4  | 3.0  | -    | -    | -    | 5.8  | -    | -    | -    | -    | -    | -    | -    | -    | -    | -    | -    | -    | -    | -    | -    | -    | -    | -    | -    | -    | -    | -    | 4.1  | 5.6  | -    | -    |     |      |   |      |
| Massachusetts  | 6.5  | 7.2  | 7.3  | 6.2  | 7.5  | 6.1  | 4.9  | 4.9  | 5.8  | 4.8  | 4.4  | 4.1  | 4.8  | 4.1  | 3.6  | -    | -    | -    | -    | -    | -    | 4.8  | -    | -    | -    | -    | -    | -    | -    | -    | -    | -    | -    | -    | -    | -    | -    | -    | 4.0  | -    | 4.9  | -    | 5.4  | 4.7  | -    |     |      |   |      |
| Michigan       | 9.7  | 8.0  | 8.3  | 8.5  | 7.3  | 6.9  | 6.8  | 6.7  | 5.3  | 5.2  | 7.5  | 4.1  | 4.5  | 4.9  | 5.1  | 4.2  | 4.0  | -    | 4.3  | -    | 4.8  | -    | 4.8  | -    | -    | -    | 3.3  | 3.8  | -    | -    | -    | 5.3  | -    | 4.3  | 5.4  | 4.7  | 4.0  | -    | 5.5  | 6.4  | 6.5  | 6.5  | 5.8  | -    | -    |     |      |   |      |
| Minnesota      | 6.3  | 7.8  | 6.9  | 7.5  | 6.9  | 5.4  | 4.5  | 7.6  | 5.9  | 5.0  | 8.5  | 6.2  | 4.6  | 7.3  | 5.2  | -    | -    | -    | -    | -    | -    | -    | -    | -    | 5.5  | -    | -    | -    | -    | -    | -    | -    | -    | -    | 3.9  | -    | 6.2  | -    | 4.8  | -    | 6.4  | 7.3  | 7.1  | -    | -    |     |      |   |      |
| Mississippi    | 5.0  | 4.5  | 4.7  | 5.6  | 6.1  | 4.6  | 5.2  | 6.9  | 4.1  | 4.3  | 6.2  | 4.0  | 3.7  | 6.5  | 4.7  | -    | -    | -    | -    | -    | -    | -    | -    | -    | -    | -    | -    | -    | -    | -    | -    | -    | -    | -    | -    | -    | -    | -    | -    | -    | -    | -    | -    | -    | -    | -   |      |   |      |
| Missouri       | 7.4  | 6.5  | 5.9  | 8.6  | 6.0  | 5.9  | 6.1  | 6.4  | 6.5  | 7.0  | 5.7  | 5.6  | 6.0  | 6.8  | 6.0  | -    | -    | -    | -    | -    | 5.8  | -    | -    | 6.3  | -    | -    | -    | -    | -    | -    | -    | -    | 4.4  | -    | 5.9  | 6.7  | 4.3  | -    | -    | 7.0  | 7.7  | 7.3  | 6.0  | 7.6  | 10.6 | -   |      |   |      |
| Montana        | 12.2 | -    | 13.3 | -    | 9.2  | 5.9  | 6.9  | 4.8  | 8.7  | 7.7  | 5.8  | 7.9  | 8.2  | 7.4  | 6.6  | -    | -    | -    | -    | -    | -    | -    | -    | -    | -    | -    | -    | -    | -    | -    | -    | -    | -    | -    | -    | -    | -    | -    | -    | -    | -    | -    | -    | -    | -    | -   | -    |   |      |
| Nebraska       | 4.1  | 4.5  | 3.3  | 5.3  | 4.2  | 2.0  | 4.0  | 4.4  | 8.8  | -    | -    | 2.0  | 4.6  | 5.2  | 2.1  | -    | -    | -    | -    | -    | -    | -    | -    | -    | -    | -    | -    | -    | -    | -    | -    | -    | -    | -    | -    | -    | -    | -    | -    | -    | -    | -    | -    | -    | -    | -   | -    |   |      |
| Nevada         | 15.0 | 20.7 | 13.2 | 17.9 | 9.4  | 17.3 | 25.6 | 11.1 | 19.9 | 11.4 | 17.4 | 10.1 | 9.1  | 12.5 | 7.9  | -    | -    | -    | -    | -    | -    | -    | -    | -    | -    | -    | -    | -    | -    | -    | -    | -    | -    | -    | -    | -    | -    | -    | -    | -    | -    | -    | -    | -    | -    | -   | -    |   |      |
| New Hampshire  | -    | 4.1  | 8.7  | 9.1  | 12.2 | 5.9  | 5.7  | 7.0  | 3.9  | 3.8  | -    | 5.9  | -    | 7.7  | -    | -    | -    | -    | -    | -    | -    | -    | -    | -    | -    | -    | -    | -    | -    | -    | -    | -    | -    | -    | -    | -    | -    | -    | -    | -    | -    | -    | -    | -    | -    | -   | -    |   |      |
| New Jersey     | 4.1  | 5.7  | 4.7  | 4.3  | 3.8  | 3.9  | 2.2  | 3.5  | 2.9  | 3.0  | 3.8  | 3.3  | 1.8  | 2.9  | 3.4  | -    | -    | -    | -    | -    | -    | -    | 3.7  | -    | -    | 2.9  | -    | 4.4  | -    | -    | -    | -    | -    | -    | 3.5  | -    | -    | 3.5  | 3.8  | -    | 4.4  | -    | 4.3  | 4.1  | -    | -   |      |   |      |
| New Mexico     | 9.9  | 11.5 | 10.9 | 9.1  | 10.6 | 9.0  | 9.3  | 9.0  | 12.7 | 8.6  | 6.4  | 10.6 | 7.9  | 8.5  | 14.0 | -    | -    | -    | -    | -    | -    | -    | -    | -    | -    | -    | -    | -    | -    | -    | -    | -    | -    | -    | -    | -    | -    | -    | -    | -    | -    | 10.5 | -    | 12.6 | -    | -   |      |   |      |
| New York       | 4.3  | 5.4  | 5.8  | 6.4  | 7.4  | 5.2  | 5.9  | 5.5  | 3.1  | 3.9  | 4.0  | 3.0  | 3.2  | 2.9  | 3.0  | 4.1  | 4.2  | 3.8  | 3.1  | 3.3  | 3.5  | 3.2  | 3.2  | 3.6  | 2.5  | 2.6  | 2.2  | 2.8  | 2.9  | 2.8  | 2.4  | 2.6  | 2.1  | 3.4  | 3.4  | 3.0  | 3.2  | 3.8  | 4.2  | 3.9  | 4.2  | 3.9  | 4.5  | -    | -    |     |      |   |      |
| North Carolina | 5.4  | 7.8  | 6.2  | 6.4  | 6.5  | 6.1  | 6.2  | 6.3  | 5.2  | 6.4  | 4.6  | 6.9  | 5.2  | 5.0  | 5.8  | 5.6  | 6.7  | -    | 5.1  | -    | -    | 6.0  | -    | 6.0  | -    | 4.5  | -    | 4.0  | -    | 4.4  | 4.7  | 4.9  | 4.9  | 4.9  | 5.6  | 5.3  | 5.0  | 5.7  | 6.3  | 4.6  | 7.7  | 4.8  | 6.3  | -    | -    |     |      |   |      |
| North Dakota   | 7.3  | -    | -    | 5.2  | -    | -    | 4.8  | 4.6  | -    | 4.5  | 6.7  | 2.3  | 9.4  | 8.5  | 5.0  | -    | -    | -    | -    | -    | -    | -    | -    | -    | -    | -    | -    | -    | -    | -    | -    | -    | -    | -    | -    | -    | -    | -    | -    | -    | -    | -    | -    | -    | -    | -   | -    |   |      |
| Ohio           | 7.9  | 8.2  | 8.5  | 6.0  | 6.5  | 7.7  | 6.5  | 6.6  | 6.6  | 5.7  | 5.2  | 5.3  | 5.6  | 5.2  | 4.3  | 5.7  | 4.6  | 4.8  | 3.7  | 3.9  | 3.8  | 3.0  | -    | -    | -    | 3.8  | 2.9  | -    | 4.5  | 4.3  | 3.4  | 4.3  | 4.8  | 4.1  | 4.6  | 4.8  | 7.3  | 5.9  | 4.3  | 6.6  | 5.2  | 5.3  | 6.2  | -    | -    |     |      |   |      |
| Oklahoma       | 11.5 | 9.2  | 8.2  | 10.3 | 9.4  | 9.6  | 7.4  | 10.9 | 8.3  | 7.6  | 5.0  | 6.8  | 6.4  | 4.6  | 5.3  | -    | -    | -    | -    | 10.7 | 7.1  | -    | -    | -    | -    | -    | -    | -    | -    | -    | -    | -    | -    | -    | -    | -    | -    | -    | 9.0  | -    | -    | 6.8  | -    | 9.5  | 8.6  | -   | 10.9 | - | 10.7 |
| Oregon         | 8.5  | 6.7  | 9.0  | 10.8 | 10.0 | 7.2  | 8.1  | 8.2  | 9.5  | 5.2  | 5.2  | 6.5  | 6.3  | 6.4  | 7.7  | -    | -    | -    | -    | -    | 7.7  | -    | -    | -    | -    | -    | -    | -    | -    | -    | -    | -    | 8.7  | -    | -    | -    | -    | -    | -    | -    | -    | -    | -    | 8.7  | -    | 8.7 |      |   |      |
| Pennsylvania   | 6.2  | 7.2  | 7.5  | 7.0  | 6.9  | 6.0  | 4.6  | 5.1  | 5.7  | 6.9  | 5.6  | 6.3  | 4.5  | 4.8  | 5.4  | 4.0  | 5.2  | -    | 5.1  | 4.5  | 3.8  | 4.2  | 4.0  | 4.0  | 3.9  | 4.9  | 3.5  | -    | 3.9  | -    | 4.6  | 5.0  | 5.0  | 3.6  | 5.6  | 3.3  | 5.7  | 4.6  | 5.6  | 6.5  | 6.4  | 6.1  | 5.8  | -    | -    |     |      |   |      |
| Rhode Island   | 6.6  | 6.4  | 7.1  | 11.3 | 6.8  | 10.9 | 2.5  | 6.4  | 7.9  | 5.5  | -    |      |      |      |      |      |      |      |      |      |      |      |      |      |      |      |      |      |      |      |      |      |      |      |      |      |      |      |      |      |      |      |      |      |      |     |      |   |      |

**eTable 4:** Multivariate regression analysis with state and year fixed effects for TRAP laws' enforcement, suicide rates, and motor vehicle crashes deaths between 1976 and 2016 examining wider age ranges.

|                                     | Suicide Rate |                  |       |           |                  |       | Motor Vehicle Accident Rate |                  |       |
|-------------------------------------|--------------|------------------|-------|-----------|------------------|-------|-----------------------------|------------------|-------|
|                                     | Age 20-44    |                  |       | Age 45-74 |                  |       | Age 20-44                   |                  |       |
|                                     | Beta         | 95% CI           | P     | Beta      | 95% CI           | P     | Beta                        | 95% CI           | P     |
| TRAP Laws <sup>a</sup>              | 0.16         | (0.00071 - 0.32) | 0.049 | 0.077     | (-0.10 - 0.26)   | 0.390 | 0.047                       | (-0.037 - 0.13)  | 0.267 |
| Black or Afr. American <sup>b</sup> | 1.24         | (-0.50 - 2.99)   | 0.157 | 1.02      | (-0.65 - 2.70)   | 0.225 | 0.23                        | (-0.40 - 0.85)   | 0.467 |
| Fraction Republicans <sup>c</sup>   | 0.059        | (-0.058 - 0.18)  | 0.314 | 0.041     | (-0.094 - 0.18)  | 0.541 | 0.085                       | (0.0026 - 0.17)  | 0.043 |
| State GDP Growth <sup>d</sup>       | 0.069        | (-0.047 - 0.18)  | 0.239 | -0.0047   | (-0.075 - 0.065) | 0.892 | 0.052                       | (-0.0094 - 0.11) | 0.095 |
| State Unemp. Rate <sup>e</sup>      | 0.085        | (-0.071 - 0.24)  | 0.278 | 0.10      | (-0.0048 - 0.21) | 0.060 | -0.12                       | (-0.19 - 0.051)  | 0.001 |
| Observations                        | 1,015        |                  |       | 1,109     |                  |       | 1,589                       |                  |       |
| R-squared                           | 0.744        |                  |       | 0.771     |                  |       | 0.857                       |                  |       |

**Caption.** Three weighted least square regressions weighted by the states' population. Column two details the covariates' betas when regressed against the state-year level suicide rates of women ages 20-44, column three details their 95% confidence intervals, and column four details their P values. Similarly, column five details the betas when regressed against the state-year level suicide rates of women ages 45-74, and column eight details the betas when regressed against the state-year level motor vehicle crashes deaths ages 20-44. Standard errors are clustered at the state and year level.

<sup>a</sup> Z score of the TRAP law index;

<sup>b</sup> Z score of the percentage of black or African American residents in a state;

<sup>c</sup> Z score fraction of republicans representing the state in the U.S. Senate;

<sup>d</sup> Z score of the annual state-level GDP growth rate;

<sup>e</sup> Z score of the annual state-level unemployment rate;

Abbreviations: TRAP laws: Targeted Regulation of Abortion Providers; MV= motor vehicle; GDP= gross domestic product.

**eTable 5:** Multivariate regression analysis with state and year fixed effects for TRAP laws' enforcement, suicide rates, and motor vehicle crashes deaths between 1976 and 2016 examining all age bins.

| Panel A                             | Suicide Rate |                 |         |           |                 |         |           |                 |         |
|-------------------------------------|--------------|-----------------|---------|-----------|-----------------|---------|-----------|-----------------|---------|
|                                     | Age 20-24    |                 |         | Age 25-34 |                 |         | Age 35-44 |                 |         |
|                                     | Beta         | 95% CI          | P value | Beta      | 95% CI          | P value | Beta      | 95% CI          | P value |
| TRAP Laws <sup>a</sup>              | 0.15         | (0.052 - 0.26)  | 0.004   | 0.14      | (-0.015 - 0.30) | 0.074   | 0.060     | (-0.11 - 0.23)  | 0.481   |
| Black or Afr. American <sup>b</sup> | 0.77         | (-0.68 - 2.23)  | 0.290   | 0.66      | (-1.19 - 2.51)  | 0.476   | 0.68      | (-1.14 - 2.50)  | 0.456   |
| Fraction Republicans <sup>c</sup>   | 0.026        | (-0.099 - 0.15) | 0.680   | 0.077     | (-0.054 - 0.21) | 0.242   | 0.097     | (-0.041 - 0.23) | 0.164   |
| State GDP Growth <sup>d</sup>       | 0.025        | (-0.12 - 0.17)  | 0.735   | 0.064     | (-0.027 - 0.16) | 0.162   | 0.041     | (-0.044 - 0.13) | 0.333   |
| State Unemp. Rate <sup>e</sup>      | 0.0014       | (-0.18 - 0.19)  | 0.988   | 0.045     | (-0.10 - 0.19)  | 0.537   | -0.0030   | (-0.12 - 0.12)  | 0.960   |
| Observations                        | 1,027        |                 |         | 1,586     |                 |         | 1,695     |                 |         |
| R-squared                           | 0.512        |                 |         | 0.582     |                 |         | 0.609     |                 |         |

| Panel B                             | Age 45-54 |                  |         | Age 55-64 |                  |         | Age 65-74 |                 |         |
|-------------------------------------|-----------|------------------|---------|-----------|------------------|---------|-----------|-----------------|---------|
|                                     | Beta      | 95% CI           | P value | Beta      | 95% CI           | P value | Beta      | 95% CI          | P value |
| TRAP Laws <sup>a</sup>              | 0.063     | (-0.094 - 0.22)  | 0.423   | 0.036     | (-0.12 - 0.19)   | 0.646   | 0.054     | (-0.11 - 0.21)  | 0.499   |
| Black or Afr. American <sup>b</sup> | 0.83      | (-0.81 - 2.47)   | 0.315   | 0.70      | (-0.87 - 2.27)   | 0.375   | 0.72      | (-0.82 - 2.26)  | 0.350   |
| Fraction Republicans <sup>c</sup>   | 0.022     | (-0.091 - 0.14)  | 0.692   | 0.013     | (-0.12 - 0.15)   | 0.845   | 0.093     | (-0.057 - 0.24) | 0.217   |
| State GDP Growth <sup>d</sup>       | -0.0026   | (-0.076 - 0.071) | 0.943   | -0.013    | (-0.071 - 0.046) | 0.669   | 0.011     | (-0.079 - 0.10) | 0.800   |
| State Unemp. Rate <sup>e</sup>      | 0.049     | (-0.059 - 0.16)  | 0.363   | 0.097     | (0.0060 - 0.19)  | 0.037   | 0.14      | (0.014 - 0.26)  | 0.030   |
| Observations                        | 1,669     |                  |         | 1,501     |                  |         | 1,147     |                 |         |
| R-squared                           | 0.669     |                  |         | 0.652     |                  |         | 0.600     |                 |         |



**Caption.** Six weighted least square regressions weighted by the states' population. Panel A, details the covariates' betas, 95% CI, and P values when regressed against the state-year level suicide rates of women ages 20-24, 25-34, and 35-44. Panel B details the same parameters for women age 45-54, 55-64, and 64-74. Standard errors are clustered at the state and year level.

<sup>a</sup> Z score of the TRAP law index;

<sup>b</sup> Z score of the percentage of black or African American residents in a state;

<sup>c</sup> Z score fraction of republicans representing the state in the U.S. Senate;

<sup>d</sup> Z score of the annual state-level GDP growth rate;

<sup>e</sup> Z score of the annual state-level unemployment rate;

Abbreviations: TRAP laws: Targeted Regulation of Abortion Providers; GDP= gross domestic product.

**eTable 6:** Multivariate regression analysis with state and year fixed effects for TRAP laws' enforcement, suicide rates, and motor vehicle crashes deaths between 1974 and 2016 excluding unemployment rate.

|                                     | Suicide Rate |                 |       |           |                  |       | Motor Vehicle Accident Rate |                  |       |
|-------------------------------------|--------------|-----------------|-------|-----------|------------------|-------|-----------------------------|------------------|-------|
|                                     | Age 20-34    |                 |       | Age 45-64 |                  |       | Age 20-34                   |                  |       |
|                                     | Beta         | 95% CI          | P     | Beta      | 95% CI           | P     | Beta                        | 95% CI           | P     |
| TRAP Laws <sup>a</sup>              | 0.17         | (0.0060 - 0.32) | 0.042 | 0.059     | (-0.13 - 0.24)   | 0.528 | 0.047                       | (-0.025 - 0.12)  | 0.194 |
| Black or Afr. American <sup>b</sup> | 1.14         | (-0.59 - 2.88)  | 0.190 | 0.92      | (-0.82 - 2.65)   | 0.293 | 0.24                        | (-0.39 - 0.87)   | 0.447 |
| Fraction Republicans <sup>c</sup>   | 0.034        | (-0.055 - 0.12) | 0.444 | 0.017     | (-0.089 - 0.12)  | 0.752 | 0.081                       | (-0.0045 - 0.17) | 0.063 |
| State GDP Growth <sup>d</sup>       | 0.022        | (-0.083 - 0.13) | 0.677 | -         | (-0.081 - 0.025) | 0.292 | 0.087                       | (0.023 - 0.15)   | 0.009 |
| Observations                        | 1,115        |                 |       | 1,564     |                  |       | 1,731                       |                  |       |
| R-squared                           | 0.670        |                 |       | 0.733     |                  |       | 0.817                       |                  |       |

**Caption.** Three weighted least square regressions weighted by the states' population. Column two details the covariates' betas when regressed against the state-year level suicide rates of women ages 20-34, column three details their 95% confidence intervals, and column four details their P values. Similarly, column five details the betas when regressed against the state-year level suicide rates of women ages 45-64, and column eight details the betas when regressed against the state-year level motor vehicle crashes deaths ages 20-34. Standard errors are clustered at the state and year level.

<sup>a</sup> Z score of the TRAP law index;

<sup>b</sup> Z score of the percentage of black or African American residents in a state;

<sup>c</sup> Z score fraction of republicans representing the state in the U.S. Senate;

<sup>d</sup> Z score of the annual state-level GDP growth rate;

Abbreviations: TRAP laws: Targeted Regulation of Abortion Providers; MV= motor vehicle; GDP= gross domestic product.

**eTable 7.** Multivariate regression analysis with state and year fixed effects for the weighted access index, suicide rates, and motor vehicle crashes deaths between 2006 and 2017 examining wider age ranges.

|                                     | Suicide Rate |                  |         |           |                  |         | Motor Vehicle Accident Rate |                  |         |
|-------------------------------------|--------------|------------------|---------|-----------|------------------|---------|-----------------------------|------------------|---------|
|                                     | Age 20-44    |                  |         | Age 45-74 |                  |         | Age 20-44                   |                  |         |
|                                     | Beta         | 95% CI           | P value | Beta      | 95% CI           | P value | Beta                        | 95% CI           | P value |
| Weighted Access Index <sup>a</sup>  | 0.51         | (0.43 - 0.60)    | 0.000   | 0.25      | (-0.089 - 0.58)  | 0.133   | 0.0017                      | (-0.17 - 0.17)   | 0.982   |
| Black or Afr. American <sup>b</sup> | 1.09         | (-1.46 - 3.63)   | 0.363   | 1.38      | (-1.50 - 4.25)   | 0.311   | -1.05                       | (-2.94 - 0.85)   | 0.242   |
| Fraction Republicans <sup>c</sup>   | 0.013        | (-0.12 - 0.15)   | 0.830   | -0.070    | (-0.13 - -0.012) | 0.023   | 0.039                       | (-0.021 - 0.100) | 0.176   |
| State GDP Growth <sup>d</sup>       | -0.12        | (-0.23 - -0.021) | 0.023   | -0.038    | (-0.13 - 0.054)  | 0.377   | -0.024                      | (-0.087 - 0.040) | 0.417   |
| State Unemp. Rate <sup>e</sup>      | -0.18        | (-0.38 - 0.014)  | 0.066   | 0.14      | (-0.096 - 0.39)  | 0.210   | -0.12                       | (-0.23 - -0.010) | 0.035   |
| Observations                        | 220          |                  |         | 268       |                  |         | 315                         |                  |         |
| R-squared                           | 0.895        |                  |         | 0.904     |                  |         | 0.940                       |                  |         |

**Caption.** Three weighted least square regressions weighted by the states' population. Column two details the covariates' betas when regressed against the state-year level suicide rates of women ages 20-44, column three details their 95% confidence intervals, and column four details their P values. Similarly, column five details the betas when regressed against the state-year level suicide rates of women ages 45-74, and column eight details the betas when regressed against the state-year level motor vehicle crashes deaths ages 20-44. Standard errors are clustered at the state and year level.

<sup>a</sup> Z score of the weighted access index;

<sup>b</sup> Z score of the percentage of black or African American residents in a state;

<sup>c</sup> Z score fraction of republicans representing the state in the U.S. Senate;

<sup>d</sup> Z score of the annual state-level GDP growth rate;

<sup>e</sup> Z score of the annual state-level unemployment rate;

Abbreviations: TRAP laws: Targeted Regulation of Abortion Providers; MV= motor vehicle; GDP= gross domestic product.

**eTable 8.** Multivariate regression analysis with state and year fixed effects for the unweighted access index, suicide rates, and motor vehicle crashes deaths between 2006 and 2017.

|                                      | Suicide Rate |                  |         |           |                 |         | Motor Vehicle Accident Rate |                  |         |
|--------------------------------------|--------------|------------------|---------|-----------|-----------------|---------|-----------------------------|------------------|---------|
|                                      | Age 20-34    |                  |         | Age 45-64 |                 |         | Age 20-34                   |                  |         |
|                                      | Beta         | 95% CI           | P value | Beta      | 95% CI          | P value | Beta                        | 95% CI           | P value |
| Unweighted Access Index <sup>a</sup> | 0.46         | (0.20 - 0.72)    | 0.003   | 0.095     | (-0.24 - 0.43)  | 0.546   | -0.056                      | (-0.21 - 0.095)  | 0.424   |
| Black or Afr. American <sup>b</sup>  | 0.69         | (-2.09 - 3.47)   | 0.591   | 1.53      | (-2.41 - 5.47)  | 0.407   | -1.99                       | (-3.87 - -0.11)  | 0.040   |
| Fraction Republicans <sup>c</sup>    | -0.047       | (-0.29 - 0.19)   | 0.670   | 0.040     | (-0.17 - 0.25)  | 0.679   | -0.0017                     | (-0.073 - 0.070) | 0.959   |
| State GDP Growth <sup>d</sup>        | -0.11        | (-0.23 - 0.0081) | 0.065   | -0.052    | (-0.12 - 0.015) | 0.117   | -0.028                      | (-0.11 - 0.055)  | 0.468   |
| State Unemp. Rate <sup>e</sup>       | -0.006       | (-0.30 - 0.29)   | 0.966   | 0.15      | (-0.035 - 0.34) | 0.100   | -0.099                      | (-0.28 - 0.082)  | 0.247   |
| Observations                         | 220          |                  |         | 415       |                 |         | 337                         |                  |         |
| R-squared                            | 0.844        |                  |         | 0.871     |                 |         | 0.909                       |                  |         |

  

|                                     | Age 20-44                            |                  |               | Age 45-74 |                  |                 | Age 20-44 |                   |                |
|-------------------------------------|--------------------------------------|------------------|---------------|-----------|------------------|-----------------|-----------|-------------------|----------------|
|                                     | Beta                                 | 95% CI           | P value       | Beta      | 95% CI           | P value         | Beta      | 95% CI            | P value        |
|                                     | Unweighted Access Index <sup>a</sup> | 0.44             | (0.30 - 0.57) | 0.000     | 0.15             | (-0.092 - 0.39) | 0.196     | -0.014            | (-0.21 - 0.18) |
| Black or Afr. American <sup>b</sup> | 1.51                                 | (-0.90 - 3.91)   | 0.193         | 1.68      | (-1.00 - 4.37)   | 0.192           | -1.02     | (-2.92 - 0.88)    | 0.254          |
| Fraction Republicans <sup>c</sup>   | 0.025                                | (-0.10 - 0.15)   | 0.671         | -0.065    | (-0.12 - -0.011) | 0.024           | 0.040     | (-0.019 - 0.098)  | 0.162          |
| State GDP Growth <sup>d</sup>       | -0.12                                | (-0.23 - -0.017) | 0.027         | -0.037    | (-0.13 - 0.055)  | 0.396           | -0.024    | (-0.088 - 0.040)  | 0.418          |
| State Unemp. Rate <sup>e</sup>      | -0.17                                | (-0.33 - -0.012) | 0.038         | 0.16      | (-0.070 - 0.39)  | 0.154           | -0.12     | (-0.23 - -0.0100) | 0.036          |
| Observations                        | 220                                  |                  |               | 268       |                  |                 | 315       |                   |                |
| R-squared                           | 0.895                                |                  |               | 0.903     |                  |                 | 0.940     |                   |                |

**Caption.** Six weighted least square regressions weighted by the states' population. Panel A, details the covariates' betas, 95% CI, and P values when regressed against the state-year level suicide rates of women ages 20-34, 45-64, and MV crashes ages 20-34. Panel B details the same parameters for women age 20-44, 45-74, and MV crashes ages 20-44. Standard errors are clustered at the state and year level.

<sup>a</sup> Z score of the Unweighted access index;

<sup>b</sup> Z score of the percentage of black or African American residents in a state;

<sup>c</sup> Z score fraction of republicans representing the state in the U.S. Senate;

<sup>d</sup> Z score of the annual state-level GDP growth rate;

<sup>e</sup> Z score of the annual state-level unemployment rate;

Abbreviations: TRAP laws: Targeted Regulation of Abortion Providers; MV= motor vehicle; GDP= gross domestic product

**eFigure 1.** Suicide death rates (left panel) and motor vehicle crashes death rates of women ages 20-34 and 45-64 in the United States during the study period.

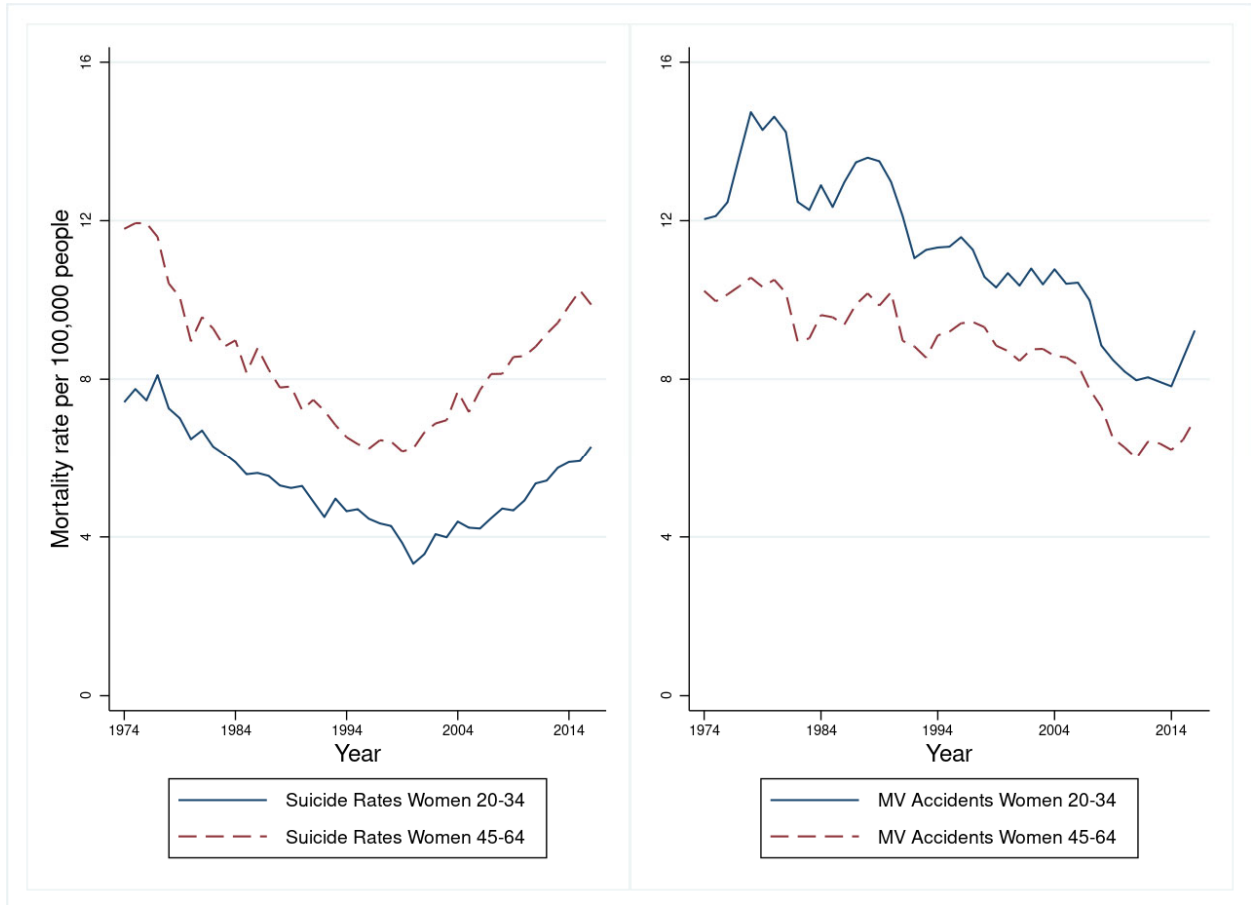

**eFigure 2.** Total number of enforced TRAP laws at the state- and year-level.

|    | 70 | 71 | 72 | 73 | 74 | 75 | 76 | 77 | 78 | 79 | 80 | 81 | 82 | 83 | 84 | 85 | 86 | 87 | 88 | 89 | 90 | 91 | 92 | 93 | 94 | 95 | 96 | 97 | 98 | 99 | 00 | 01 | 02 | 03 | 04 | 05 | 06 | 07 | 08 | 09 | 10 | 11 | 12 | 13 | 14 | 15 | 16 | 17 |   |   |   |   |   |   |   |
|----|----|----|----|----|----|----|----|----|----|----|----|----|----|----|----|----|----|----|----|----|----|----|----|----|----|----|----|----|----|----|----|----|----|----|----|----|----|----|----|----|----|----|----|----|----|----|----|----|---|---|---|---|---|---|---|
| AK | 2  | 2  | 2  | 2  | 2  | 2  | 2  | 2  | 2  | 2  | 2  | 2  | 2  | 2  | 2  | 2  | 2  | 2  | 2  | 2  | 2  | 2  | 2  | 2  | 2  | 2  | 2  | 2  | 2  | 2  | 2  | 2  | 2  | 2  | 2  | 2  | 2  | 2  | 2  | 2  | 2  | 2  | 2  | 2  | 2  | 2  | 2  | 2  | 2 | 2 |   |   |   |   |   |
| FL | 0  | 0  | 0  | 0  | 0  | 0  | 0  | 0  | 0  | 0  | 0  | 0  | 0  | 0  | 0  | 0  | 0  | 0  | 0  | 0  | 0  | 0  | 0  | 0  | 0  | 0  | 0  | 0  | 0  | 0  | 0  | 0  | 0  | 0  | 0  | 0  | 0  | 0  | 0  | 0  | 0  | 0  | 0  | 0  | 0  | 0  | 0  | 0  | 2 | 2 |   |   |   |   |   |
| GA | 0  | 0  | 0  | 0  | 3  | 3  | 3  | 3  | 3  | 3  | 3  | 3  | 3  | 3  | 3  | 3  | 3  | 3  | 3  | 3  | 3  | 3  | 3  | 3  | 3  | 3  | 3  | 3  | 3  | 3  | 3  | 3  | 3  | 3  | 3  | 3  | 3  | 3  | 3  | 3  | 3  | 3  | 3  | 3  | 3  | 3  | 3  | 3  | 3 | 3 |   |   |   |   |   |
| IL | 0  | 0  | 0  | 3  | 3  | 3  | 3  | 3  | 3  | 3  | 3  | 3  | 3  | 3  | 3  | 3  | 3  | 3  | 3  | 3  | 3  | 3  | 3  | 3  | 3  | 3  | 3  | 3  | 3  | 3  | 3  | 3  | 3  | 3  | 3  | 3  | 3  | 3  | 3  | 3  | 3  | 3  | 3  | 3  | 3  | 3  | 3  | 3  | 3 | 3 |   |   |   |   |   |
| IN | 0  | 0  | 0  | 2  | 2  | 2  | 2  | 2  | 2  | 2  | 2  | 2  | 2  | 2  | 2  | 2  | 2  | 2  | 2  | 2  | 2  | 2  | 2  | 2  | 2  | 2  | 2  | 2  | 2  | 2  | 2  | 2  | 2  | 2  | 2  | 2  | 2  | 2  | 2  | 2  | 2  | 2  | 2  | 3  | 3  | 3  | 3  | 3  | 3 | 3 |   |   |   |   |   |
| KY | 0  | 0  | 0  | 0  | 0  | 0  | 0  | 0  | 0  | 0  | 0  | 0  | 0  | 0  | 0  | 0  | 0  | 0  | 0  | 0  | 0  | 0  | 0  | 0  | 0  | 0  | 0  | 0  | 0  | 1  | 1  | 1  | 1  | 1  | 1  | 1  | 1  | 1  | 1  | 1  | 1  | 1  | 1  | 1  | 1  | 1  | 1  | 1  | 1 | 1 | 1 |   |   |   |   |
| LA | 0  | 0  | 0  | 0  | 0  | 0  | 0  | 0  | 0  | 0  | 0  | 0  | 0  | 0  | 0  | 0  | 0  | 0  | 0  | 0  | 0  | 0  | 0  | 0  | 0  | 0  | 0  | 0  | 0  | 0  | 0  | 0  | 0  | 0  | 0  | 0  | 0  | 0  | 0  | 0  | 0  | 0  | 0  | 0  | 0  | 0  | 0  | 0  | 1 | 1 | 1 | 0 |   |   |   |
| MD | 0  | 0  | 0  | 0  | 0  | 0  | 0  | 0  | 0  | 0  | 0  | 0  | 0  | 0  | 0  | 0  | 0  | 0  | 0  | 0  | 0  | 0  | 0  | 0  | 0  | 0  | 0  | 0  | 0  | 0  | 0  | 0  | 0  | 0  | 0  | 0  | 0  | 0  | 0  | 0  | 0  | 0  | 0  | 0  | 0  | 0  | 0  | 0  | 1 | 1 | 1 | 1 | 1 |   |   |
| MI | 0  | 0  | 0  | 0  | 0  | 0  | 0  | 0  | 0  | 0  | 0  | 0  | 0  | 0  | 0  | 0  | 0  | 0  | 0  | 0  | 0  | 0  | 0  | 0  | 0  | 0  | 0  | 0  | 0  | 0  | 2  | 2  | 2  | 2  | 2  | 2  | 2  | 2  | 2  | 2  | 2  | 2  | 2  | 2  | 2  | 2  | 2  | 2  | 2 | 2 | 2 | 2 |   |   |   |
| MO | 0  | 0  | 0  | 0  | 0  | 0  | 0  | 0  | 0  | 0  | 0  | 0  | 0  | 0  | 0  | 0  | 0  | 0  | 0  | 1  | 1  | 1  | 1  | 1  | 1  | 1  | 1  | 1  | 1  | 1  | 1  | 1  | 1  | 1  | 1  | 1  | 1  | 1  | 1  | 1  | 3  | 3  | 3  | 3  | 3  | 3  | 3  | 3  | 3 | 3 | 3 |   |   |   |   |
| MS | 0  | 0  | 0  | 0  | 0  | 0  | 0  | 0  | 0  | 0  | 0  | 0  | 0  | 0  | 0  | 0  | 0  | 0  | 0  | 0  | 0  | 0  | 0  | 0  | 0  | 0  | 0  | 0  | 0  | 0  | 0  | 0  | 0  | 0  | 0  | 0  | 0  | 1  | 1  | 1  | 1  | 1  | 1  | 1  | 1  | 1  | 3  | 2  | 2 | 2 | 2 | 2 |   |   |   |
| ND | 0  | 0  | 0  | 0  | 0  | 0  | 0  | 0  | 0  | 0  | 0  | 0  | 0  | 0  | 0  | 0  | 0  | 0  | 0  | 0  | 0  | 0  | 0  | 0  | 0  | 0  | 0  | 0  | 0  | 0  | 0  | 0  | 0  | 0  | 0  | 0  | 0  | 0  | 0  | 0  | 0  | 0  | 0  | 0  | 0  | 0  | 0  | 0  | 1 | 1 | 1 | 1 |   |   |   |
| OH | 0  | 0  | 0  | 0  | 0  | 0  | 0  | 0  | 0  | 0  | 0  | 0  | 0  | 0  | 0  | 0  | 0  | 0  | 0  | 0  | 0  | 0  | 0  | 0  | 0  | 0  | 0  | 0  | 0  | 0  | 2  | 2  | 2  | 2  | 2  | 2  | 2  | 2  | 2  | 2  | 2  | 2  | 2  | 2  | 2  | 2  | 2  | 2  | 2 | 2 | 2 | 2 |   |   |   |
| PA | 0  | 0  | 0  | 0  | 0  | 0  | 0  | 0  | 0  | 0  | 0  | 0  | 0  | 0  | 0  | 0  | 0  | 0  | 0  | 0  | 0  | 0  | 0  | 0  | 0  | 0  | 0  | 0  | 0  | 0  | 0  | 0  | 0  | 0  | 0  | 0  | 0  | 0  | 0  | 0  | 0  | 0  | 0  | 0  | 0  | 0  | 0  | 3  | 3 | 3 | 3 | 3 | 3 |   |   |
| RI | 0  | 0  | 0  | 1  | 1  | 1  | 1  | 1  | 1  | 1  | 1  | 1  | 1  | 1  | 1  | 1  | 1  | 1  | 1  | 1  | 1  | 1  | 1  | 1  | 1  | 1  | 1  | 1  | 1  | 1  | 1  | 1  | 1  | 1  | 1  | 1  | 1  | 1  | 1  | 1  | 1  | 1  | 1  | 1  | 1  | 1  | 1  | 1  | 1 | 1 | 1 |   |   |   |   |
| SC | 0  | 0  | 0  | 0  | 0  | 0  | 0  | 0  | 0  | 0  | 0  | 0  | 0  | 0  | 0  | 0  | 0  | 0  | 0  | 0  | 0  | 0  | 0  | 0  | 0  | 0  | 0  | 0  | 0  | 0  | 0  | 0  | 0  | 0  | 0  | 0  | 0  | 0  | 0  | 0  | 0  | 0  | 0  | 0  | 0  | 0  | 0  | 0  | 0 | 0 | 0 | 0 | 0 |   |   |
| TN | 0  | 0  | 0  | 0  | 0  | 0  | 0  | 0  | 0  | 0  | 0  | 0  | 0  | 0  | 0  | 0  | 0  | 0  | 0  | 0  | 0  | 0  | 0  | 0  | 0  | 0  | 0  | 0  | 0  | 0  | 0  | 0  | 0  | 0  | 0  | 0  | 0  | 0  | 0  | 0  | 0  | 0  | 0  | 0  | 0  | 0  | 0  | 0  | 0 | 1 | 1 | 1 | 3 | 3 | 3 |
| TX | 0  | 0  | 0  | 0  | 0  | 0  | 0  | 0  | 0  | 0  | 0  | 0  | 0  | 0  | 0  | 0  | 0  | 0  | 0  | 0  | 0  | 0  | 0  | 0  | 0  | 0  | 0  | 0  | 0  | 0  | 0  | 0  | 0  | 0  | 0  | 0  | 0  | 0  | 0  | 0  | 0  | 0  | 0  | 0  | 0  | 0  | 0  | 0  | 0 | 0 | 0 | 0 | 0 | 0 |   |
| UT | 0  | 0  | 0  | 0  | 0  | 0  | 0  | 0  | 0  | 0  | 0  | 0  | 0  | 0  | 0  | 0  | 0  | 0  | 0  | 0  | 0  | 0  | 0  | 0  | 0  | 0  | 0  | 0  | 0  | 2  | 2  | 2  | 2  | 2  | 2  | 2  | 2  | 2  | 2  | 2  | 2  | 2  | 2  | 2  | 2  | 2  | 2  | 2  | 2 | 2 | 2 | 2 | 2 | 2 |   |
| VA | 0  | 0  | 0  | 0  | 0  | 0  | 0  | 0  | 0  | 0  | 0  | 0  | 0  | 0  | 0  | 0  | 0  | 0  | 0  | 0  | 0  | 0  | 0  | 0  | 0  | 0  | 0  | 0  | 0  | 0  | 0  | 0  | 0  | 0  | 0  | 0  | 0  | 0  | 0  | 0  | 0  | 0  | 0  | 0  | 0  | 0  | 0  | 0  | 0 | 0 | 0 | 0 | 0 | 0 |   |
| WI | 0  | 0  | 0  | 0  | 0  | 0  | 1  | 1  | 1  | 1  | 1  | 1  | 1  | 1  | 1  | 1  | 1  | 1  | 1  | 1  | 1  | 1  | 1  | 1  | 1  | 1  | 1  | 1  | 1  | 1  | 1  | 1  | 1  | 1  | 1  | 1  | 1  | 1  | 1  | 1  | 1  | 1  | 1  | 1  | 1  | 1  | 1  | 1  | 1 | 1 | 1 | 1 | 1 |   |   |

**eFigure 3.** Unweighted Access Index by year from 2006-2017

|    | 06 | 07 | 08 | 09 | 10 | 11 | 12 | 13 | 14 | 15 | 16 | 17 |
|----|----|----|----|----|----|----|----|----|----|----|----|----|
| AL | 7  | 6  | 6  | 6  | 6  | 7  | 7  | 7  | 7  | 9  | 10 | 11 |
| AK | 2  | 2  | 2  | 2  | 2  | 2  | 2  | 2  | 3  | 4  | 3  | 3  |
| AZ | 4  | 3  | 3  | 4  | 4  | 4  | 5  | 6  | 7  | 8  | 8  | 8  |
| AR | 6  | 4  | 4  | 4  | 5  | 5  | 5  | 7  | 8  | 7  | 8  | 10 |
| CA | -4 | -4 | -4 | -4 | -4 | -4 | -4 | -4 | -4 | -7 | -7 | -7 |
| CO | 2  | 2  | 2  | 2  | 1  | 1  | 1  | 0  | 0  | -1 | -1 | -1 |
| CT | -2 | -3 | -3 | -3 | -3 | -3 | -3 | -4 | -5 | -6 | -5 | -6 |
| DE | 4  | 4  | 4  | 4  | 4  | 4  | 4  | 4  | 5  | 4  | 4  | 4  |
| DC | 0  | 1  | 1  | 0  | 0  | 0  | 0  | 0  | 0  | -3 | -2 | -2 |
| FL | 5  | 4  | 4  | 4  | 4  | 4  | 4  | 5  | 5  | 5  | 6  | 6  |
| GA | 4  | 4  | 4  | 4  | 4  | 3  | 4  | 5  | 5  | 5  | 5  | 5  |
| HI | -3 | -2 | -2 | -2 | -2 | -2 | -2 | -2 | -2 | -2 | -2 | -3 |
| ID | 6  | 6  | 6  | 6  | 6  | 7  | 7  | 7  | 7  | 7  | 8  | 8  |
| IL | 1  | 0  | 0  | 0  | 0  | 1  | 0  | 0  | 0  | 0  | 1  | 0  |
| IN | 6  | 6  | 6  | 6  | 6  | 7  | 6  | 6  | 6  | 7  | 9  | 9  |
| IA | 3  | 3  | 3  | 3  | 3  | 3  | 3  | 3  | 3  | 2  | 2  | 5  |
| KS | 4  | 4  | 4  | 4  | 4  | 7  | 7  | 9  | 8  | 10 | 11 | 11 |
| KY | 7  | 7  | 7  | 7  | 7  | 7  | 7  | 7  | 7  | 6  | 6  | 7  |
| LA | 8  | 7  | 7  | 7  | 7  | 7  | 8  | 9  | 9  | 9  | 11 | 11 |
| ME | -1 | -1 | -1 | -1 | -1 | -1 | -1 | -1 | -1 | -1 | -2 | -2 |
| MD | -1 | -3 | -3 | -3 | -3 | -3 | -2 | -2 | -2 | -1 | -3 | -2 |
| MA | 1  | 1  | 1  | 1  | 1  | 1  | 1  | 1  | 1  | 2  | 1  | 1  |
| MI | 6  | 5  | 5  | 5  | 5  | 6  | 6  | 7  | 8  | 8  | 9  | 8  |
| MN | 3  | 1  | 1  | 1  | 1  | 1  | 1  | 2  | 2  | 2  | 1  | 1  |
| MS | 7  | 6  | 6  | 6  | 6  | 6  | 6  | 7  | 8  | 9  | 10 | 10 |
| MO | 6  | 5  | 5  | 5  | 5  | 5  | 5  | 6  | 7  | 7  | 8  | 8  |
| MT | 0  | 0  | 0  | 0  | 0  | 0  | -1 | -1 | -1 | -1 | -1 | -3 |
| NE | 6  | 7  | 7  | 7  | 8  | 8  | 8  | 9  | 9  | 8  | 8  | 8  |
| NV | 1  | 0  | 0  | 0  | 0  | 0  | 0  | 0  | 0  | 0  | 0  | 0  |
| NH | -1 | -2 | -2 | -2 | -2 | -1 | 0  | -1 | -2 | -2 | -1 | -2 |
| NJ | 0  | -1 | -1 | -1 | -1 | -1 | -1 | -1 | -1 | 0  | 1  | 0  |
| NM | 0  | 0  | 0  | 0  | 0  | 0  | 0  | 0  | 0  | 2  | 0  | 1  |
| NY | -1 | -2 | -2 | -2 | -2 | -2 | -2 | -2 | -2 | -2 | -2 | -3 |
| NC | 2  | 1  | 1  | 1  | 1  | 1  | 2  | 3  | 3  | 3  | 4  | 4  |
| ND | 6  | 7  | 7  | 7  | 7  | 8  | 8  | 10 | 10 | 11 | 12 | 12 |
| OH | 7  | 7  | 7  | 7  | 7  | 6  | 6  | 7  | 7  | 7  | 8  | 9  |
| OK | 7  | 6  | 6  | 6  | 6  | 7  | 7  | 9  | 9  | 10 | 11 | 11 |
| OR | -3 | -5 | -5 | -5 | -5 | -5 | -5 | -5 | -5 | -6 | -5 | -5 |
| PA | 6  | 5  | 5  | 5  | 4  | 4  | 4  | 5  | 5  | 7  | 8  | 8  |
| RI | 5  | 4  | 4  | 4  | 4  | 4  | 4  | 4  | 3  | 3  | 4  | 2  |
| SC | 6  | 5  | 5  | 5  | 5  | 5  | 5  | 6  | 6  | 6  | 7  | 7  |
| SD | 6  | 6  | 6  | 6  | 6  | 7  | 7  | 8  | 8  | 7  | 9  | 9  |
| TN | 5  | 5  | 5  | 5  | 5  | 5  | 5  | 6  | 7  | 7  | 7  | 8  |
| TX | 5  | 4  | 4  | 5  | 5  | 5  | 5  | 8  | 6  | 7  | 8  | 10 |
| UT | 7  | 7  | 7  | 6  | 6  | 6  | 5  | 5  | 5  | 6  | 6  | 6  |
| VT | -3 | -2 | -3 | -3 | -3 | -3 | -3 | -3 | -4 | -3 | -3 | -3 |
| VA | 6  | 6  | 6  | 6  | 6  | 6  | 6  | 7  | 7  | 7  | 7  | 7  |
| WA | -2 | -4 | -4 | -4 | -4 | -4 | -4 | -4 | -4 | -6 | -5 | -6 |
| WV | 2  | 2  | 2  | 2  | 2  | 2  | 2  | 3  | 3  | 5  | 5  | 5  |
| WI | 6  | 5  | 4  | 3  | 3  | 3  | 3  | 4  | 4  | 4  | 4  | 4  |
| WY | 3  | 4  | 3  | 3  | 3  | 3  | 3  | 2  | 3  | 2  | 2  | 2  |

**eFigure 4. Weighted Access Index by year from 2006-2017**

|    | 06   | 07  | 08  | 09  | 10  | 11  | 12  | 13  | 14   | 15   | 16   | 17   |
|----|------|-----|-----|-----|-----|-----|-----|-----|------|------|------|------|
| AL | 145  | 140 | 140 | 140 | 140 | 160 | 160 | 160 | 160  | 175  | 195  | 215  |
| AK | 75   | 75  | 75  | 75  | 75  | 75  | 75  | 75  | 100  | 125  | 100  | 100  |
| AZ | 75   | 70  | 70  | 95  | 95  | 95  | 115 | 130 | 135  | 150  | 125  | 125  |
| AR | 135  | 105 | 105 | 105 | 115 | 115 | 115 | 150 | 155  | 145  | 145  | 165  |
| CA | -110 | -85 | -85 | -85 | -85 | -85 | -85 | -85 | -120 | -175 | -175 | -175 |
| CO | 55   | 60  | 60  | 60  | 40  | 40  | 40  | 40  | 20   | 10   | 10   | 10   |
| CT | -50  | -75 | -75 | -75 | -75 | -75 | -75 | -80 | -90  | -120 | -90  | -120 |
| DE | 85   | 110 | 110 | 110 | 110 | 110 | 110 | 110 | 115  | 105  | 85   | 85   |
| DC | 30   | 60  | 60  | 35  | 35  | 35  | 35  | 35  | 35   | -45  | -15  | -15  |
| FL | 135  | 130 | 130 | 130 | 130 | 130 | 130 | 145 | 145  | 145  | 145  | 145  |
| GA | 115  | 115 | 115 | 115 | 115 | 110 | 130 | 145 | 145  | 155  | 155  | 155  |
| HI | -80  | -50 | -50 | -50 | -50 | -50 | -50 | -50 | -50  | -50  | -50  | -65  |
| ID | 155  | 155 | 155 | 155 | 155 | 175 | 175 | 175 | 175  | 175  | 190  | 190  |
| IL | 20   | 15  | 15  | 15  | 15  | 45  | 15  | 15  | 15   | 5    | 10   | -20  |
| IN | 145  | 145 | 145 | 145 | 145 | 165 | 160 | 160 | 160  | 160  | 175  | 175  |
| IA | 80   | 105 | 105 | 105 | 105 | 105 | 105 | 105 | 105  | 95   | 95   | 145  |
| KS | 100  | 100 | 100 | 100 | 100 | 170 | 170 | 185 | 185  | 205  | 205  | 205  |
| KY | 165  | 165 | 165 | 165 | 165 | 165 | 165 | 165 | 165  | 155  | 155  | 175  |
| LA | 165  | 160 | 160 | 160 | 160 | 160 | 180 | 195 | 195  | 185  | 205  | 205  |
| ME | -35  | -35 | -35 | -35 | -35 | -35 | -35 | -35 | -35  | -20  | -25  | -25  |
| MD | -35  | -45 | -45 | -45 | -45 | -45 | -35 | -35 | -35  | 5    | -45  | -20  |
| MA | 30   | 30  | 30  | 30  | 30  | 30  | 30  | 30  | 30   | 55   | 30   | 30   |
| MI | 130  | 125 | 125 | 125 | 125 | 145 | 145 | 160 | 165  | 165  | 165  | 145  |
| MN | 85   | 55  | 55  | 55  | 55  | 55  | 55  | 70  | 70   | 85   | 60   | 60   |
| MS | 155  | 150 | 150 | 150 | 150 | 150 | 150 | 165 | 185  | 185  | 205  | 205  |
| MO | 145  | 140 | 140 | 140 | 140 | 140 | 140 | 155 | 175  | 165  | 170  | 170  |
| MT | 25   | 25  | 25  | 25  | 25  | 25  | 20  | 20  | 20   | 15   | 20   | -35  |
| NE | 135  | 165 | 165 | 165 | 185 | 185 | 185 | 200 | 200  | 190  | 190  | 190  |
| NV | 20   | -10 | -10 | -10 | -10 | -10 | -10 | -10 | -10  | -10  | -10  | -10  |
| NH | 5    | -20 | -20 | -20 | -20 | 5   | 25  | 20  | 5    | 0    | 30   | 0    |
| NJ | 30   | 0   | 0   | 0   | 0   | 0   | 0   | 0   | 0    | 25   | 10   | 0    |
| NM | -10  | 15  | 15  | 15  | 15  | 15  | 15  | 15  | 15   | 55   | 20   | 40   |
| NY | 0    | -5  | -5  | -5  | -5  | -5  | -5  | -5  | -5   | -10  | -15  | -80  |
| NC | 75   | 70  | 70  | 70  | 70  | 70  | 95  | 110 | 110  | 110  | 110  | 110  |
| ND | 155  | 165 | 165 | 165 | 165 | 165 | 165 | 200 | 200  | 200  | 200  | 200  |
| OH | 165  | 165 | 165 | 165 | 165 | 160 | 160 | 175 | 175  | 175  | 180  | 200  |
| OK | 155  | 135 | 135 | 135 | 135 | 155 | 155 | 195 | 195  | 205  | 205  | 205  |
| OR | -40  | -65 | -65 | -65 | -65 | -65 | -65 | -65 | -65  | -95  | -65  | -105 |
| PA | 145  | 140 | 140 | 140 | 115 | 115 | 115 | 130 | 130  | 180  | 180  | 180  |
| RI | 135  | 130 | 130 | 130 | 130 | 130 | 130 | 130 | 105  | 100  | 130  | 75   |
| SC | 140  | 135 | 135 | 135 | 135 | 135 | 135 | 150 | 150  | 140  | 160  | 160  |
| SD | 155  | 155 | 155 | 155 | 155 | 155 | 155 | 170 | 170  | 160  | 180  | 180  |
| TN | 135  | 135 | 135 | 135 | 135 | 135 | 135 | 150 | 170  | 160  | 160  | 180  |
| TX | 135  | 130 | 130 | 140 | 140 | 140 | 140 | 180 | 150  | 150  | 155  | 195  |
| UT | 155  | 155 | 155 | 130 | 130 | 130 | 130 | 130 | 130  | 130  | 130  | 130  |
| VT | -65  | -55 | -65 | -65 | -65 | -65 | -65 | -65 | -65  | -45  | -40  | -45  |
| VA | 140  | 160 | 160 | 160 | 160 | 160 | 160 | 175 | 175  | 175  | 175  | 175  |
| WA | -60  | -90 | -90 | -90 | -90 | -90 | -90 | -90 | -90  | -130 | -100 | -130 |
| WV | 50   | 50  | 50  | 50  | 50  | 50  | 50  | 65  | 65   | 110  | 105  | 105  |
| WI | 130  | 125 | 100 | 70  | 70  | 70  | 70  | 85  | 85   | 95   | 95   | 95   |
| WY | 80   | 110 | 105 | 105 | 105 | 105 | 105 | 85  | 105  | 95   | 95   | 95   |



**eFigure 5.** Dynamic difference-in-differences in motor vehicle accident death rates around a TRAP law enforcement split by relative years of enforcement.

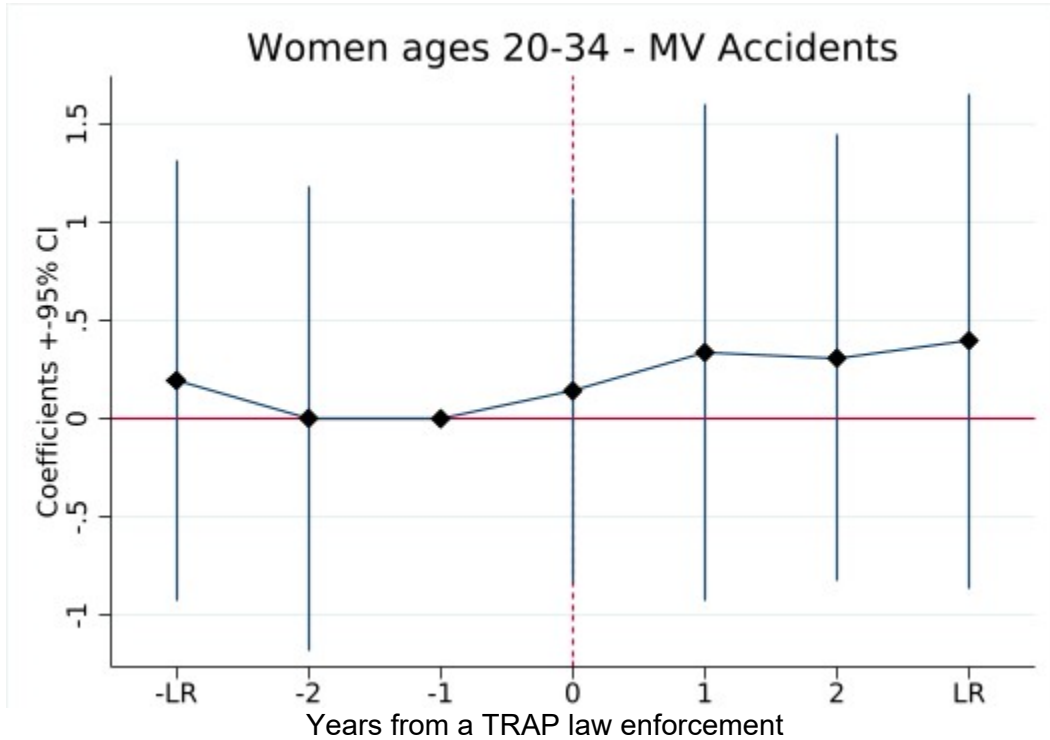

The coefficients and 95% CI of a dynamic difference-in-differences analysis regressed on the target group of women ages 20-34. As observed, no statistically significant trends could be traced in the plot. -LR is a dummy variable turning one 3 years before the enforcement and earlier, and LR is a dummy variable turning one 3 years after the enforcement onward.

Abbreviation: TRAP= Targeted Regulation of Abortion Providers.
